# Supplementary material
Source: publisher figshare collection journal article supplement (https://acs.figshare.com/ndownloader/files/8526448)
Supplement: Supplementary file 1 [file 8526448]

158
Compound (BN)2-1
C                  5.59866200    0.65642800   -0.06459000
 C                  4.97327700   -0.49144000    0.38871400
 C                  2.85844800    0.30534300   -0.19168000
 C                  3.45722100    1.46478100   -0.70355200
 C                  4.83401600    1.67243500   -0.64883500
 C                  1.39097600    0.14492100   -0.19591000
 C                  0.84106500   -1.15270400   -0.21062000
 C                 -0.54759800   -1.26829800   -0.19203100
 H                 -0.97128500   -2.26749000   -0.15141600
 C                 -1.39096500   -0.14484800   -0.19591500
 C                 -0.84105400    1.15278200   -0.21041000
 C                  0.54760700    1.26837000   -0.19182400
 H                  6.67730500    0.74247600    0.02348600
 H                  5.54123500   -1.31178900    0.80614900
 H                  2.82214000    2.21300600   -1.16364200
 H                  0.97129600    2.26755500   -0.15105100
 C                 -2.85843100   -0.30528400   -0.19168900
 C                 -3.45719600   -1.46466200   -0.70369700
 C                 -4.97326600    0.49137100    0.38888400
 C                 -4.83398900   -1.67235900   -0.64895900
 H                 -2.82212000   -2.21280800   -1.16392200
 C                 -5.59863700   -0.65645600   -0.06454900
 H                 -5.54123000    1.31165400    0.80643800
 H                 -6.67727400   -0.74254000    0.02356200
 C                 -1.77013100    2.33151700   -0.30223200
 H                 -2.12564900    2.35591100   -1.33518500
 H                 -1.20143200    3.25310500   -0.16409600
 C                  1.77014300   -2.33142600   -0.30265600
 H                  1.20142800   -3.25304600   -0.16478400
 H                  2.12574100   -2.35555700   -1.33558800
 C                  4.27755900   -3.27235900    0.64984700
 C                  5.04625500   -3.68112300    1.78616700
 C                  4.67958700   -3.85483100   -0.59330400
 C                  6.02475800   -4.68121500    1.68338900
 C                  5.66214700   -4.85354400   -0.64892600
 C                  6.32879300   -5.31480100    0.48269400
 H                  6.57301000   -4.96459400    2.58075100
 H                  5.92228600   -5.27437500   -1.61936200
 C                  2.26519000   -2.19978500    2.28079300
 C                  1.59409100   -3.40161700    2.65717300
 C                  2.18676300   -1.13090000    3.21968800
 C                  0.89075900   -3.49745000    3.86609100
 C                  1.46702400   -1.26730900    4.41478000
 C                  0.79606500   -2.43748300    4.76161900
 H                  0.40923700   -4.44354600    4.11355200
 H                  1.44093800   -0.42519200    5.10408000
 C                 -4.27760000    3.27224700    0.65018500
 C                 -5.04622900    3.68115500    1.78649900
 C                 -4.67966000    3.85461600   -0.59300200
 C                 -6.02463700    4.68133600    1.68367500
 C                 -5.66211600    4.85342700   -0.64867300
 C                 -6.32865100    5.31486000    0.48294000
 H                 -6.57283500    4.96483500    2.58103200
 H                 -5.92227200    5.27418000   -1.61913900
 C                 -2.26531000    2.19946600    2.28115400
 C                 -1.59419200    3.40124200    2.65770100
 C                 -2.18691200    1.13046500    3.21991800
 C                 -0.89084200    3.49689800    3.86661600
 C                 -1.46715300    1.26670200    4.41502100
 C                 -0.79615400    2.43680800    4.76200300
 H                 -0.40931000    4.44295800    4.11420300
 H                 -1.44108300    0.42449900    5.10421700
 C                  4.14717300   -3.43869100   -1.95692200
 H                  3.16688600   -3.87441100   -2.18132500
 H                  4.05575000   -2.35353700   -2.06192400
 H                  4.83239100   -3.78063800   -2.74002500
 C                  7.34453800   -6.42941500    0.40638700
 H                  8.10961300   -6.33033100    1.18457200
 H                  6.87068900   -7.41125400    0.54276200
 H                  7.84968200   -6.44810900   -0.56599900
 C                  4.92929600   -3.06614900    3.17250900
 H                  4.79559400   -1.98283000    3.14592500
 H                  4.08718800   -3.46827100    3.74310700
 H                  5.84377200   -3.27042600    3.74100100
 C                  1.58870600   -4.68518500    1.83526700
 H                  1.65685200   -5.55326100    2.50157400
 H                  0.65050900   -4.79922600    1.27387700
 H                  2.41093000   -4.75527200    1.12466400
 C                  2.88729100    0.20900200    3.06050100
 H                  3.94630400    0.11130800    2.80131900
 H                  2.41760300    0.84161800    2.30064200
 H                  2.83988700    0.76669300    4.00118500
 C                  0.00459100   -2.54788700    6.04345500
 H                  0.44063800   -1.93403900    6.83990200
 H                 -1.03223400   -2.20924600    5.90739900
 H                 -0.03914200   -3.58305800    6.40077800
 C                 -1.58885600    4.68495100    1.83601400
 H                 -1.65715500    5.55290500    2.50246400
 H                 -0.65061100    4.79918400    1.27474100
 H                 -2.41101600    4.75508600    1.12534500
 C                 -0.00464600    2.54702100    6.04383400
 H                 -0.44042600    1.93271800    6.84007400
 H                  1.03229400    2.20880900    5.90758600
 H                  0.03874100    3.58207500    6.40154400
 C                 -2.88749500   -0.20939400    3.06060000
 H                 -3.94651000   -0.11163400    2.80145300
 H                 -2.41784500   -0.84195200    2.30066800
 H                 -2.84009300   -0.76718100    4.00122700
 C                 -4.92932100    3.06624500    3.17287200
 H                 -4.79573100    1.98290900    3.14634300
 H                 -4.08717000    3.46830000    3.74345300
 H                 -5.84377400    3.27064500    3.74135800
 C                 -4.14741100    3.43822900   -1.95661400
 H                 -4.05587300    2.35306900   -2.06139200
 H                 -4.83279200    3.77993100   -2.73968100
 H                 -3.16721000    3.87402400   -2.18126200
 C                 -7.34429000    6.42957000    0.40659100
 H                 -8.10945900    6.33050300    1.18468700
 H                 -6.87037100    7.41135900    0.54308200
 H                 -7.84932400    6.44836500   -0.56585000
 N                 -3.64014400    0.68796900    0.33067800
 N                  3.64014600   -0.68799100    0.33053100
 B                  3.00178500   -2.19821100    0.79023800
 B                 -3.00185400    2.19805400    0.79056500
 C                 -5.47117600   -2.90468700   -1.24166400
 C                 -5.89092100   -2.70191800   -2.71416200
 H                 -6.35408300   -3.17916800   -0.65043400
 H                 -4.77168500   -3.74747100   -1.17907600
 C                 -6.54610900   -3.94775400   -3.32276000
 H                 -6.58264200   -1.85072400   -2.77790100
 H                 -5.00695000   -2.42238000   -3.30362500
 C                 -6.95809100   -3.75901500   -4.78861600
 H                 -5.85231600   -4.79778700   -3.24566900
 H                 -7.42984100   -4.22136900   -2.72771100
 H                 -7.64907200   -2.90649700   -4.86497200
 H                 -6.07274800   -3.48612900   -5.38168200
 C                  5.47121900    2.90483600   -1.24137700
 C                  5.89092300    2.70228000   -2.71391700
 H                  6.35413900    3.17921900   -0.65012500
 H                  4.77174400    3.74762400   -1.17866000
 C                  6.54612600    3.94819800   -3.32233800
 H                  6.58260900    1.85107100   -2.77782300
 H                  5.00692100    2.42287600   -3.30339900
 C                  6.95819900    3.75962700   -4.78818900
 H                  5.85230200    4.79820100   -3.24519700
 H                  7.42981200    4.22177500   -2.72720400
 H                  7.64922800    2.90715300   -4.86459700
 H                  6.07290100    3.48675900   -5.38133000
 C                  7.61622800    5.00203800   -5.40190700
 C                  8.02366100    4.81710900   -6.86936800
 H                  8.50377200    5.27330900   -4.81089800
 H                  6.92673600    5.85575500   -5.32227200
 C                  8.68072400    6.06170000   -7.47466000
 H                  8.71212900    3.96378600   -6.94918100
 H                  7.13638000    4.54737000   -7.45967100
 H                  8.95797800    5.89845400   -8.52225700
 H                  8.00367900    6.92413300   -7.43968400
 H                  9.59159900    6.33486200   -6.92775400
 C                 -7.61615000   -5.00132800   -5.40249400
 C                 -8.02341700   -4.81626400   -6.86998400
 H                 -8.50377700   -5.27257400   -4.81159900
 H                 -6.92673300   -5.85510600   -5.32285200
 C                 -8.68048200   -6.06077000   -7.47543900
 H                 -8.71182700   -3.96289500   -6.94980600
 H                 -7.13605900   -4.54652800   -7.46017400
 H                 -8.95758800   -5.89744100   -8.52306200
 H                 -8.00349400   -6.92324900   -7.44043000
 H                 -9.59144600   -6.33391300   -6.92867200
116
Compound (BN)2-1a
C                 -5.50675900   -1.39572100    0.75819900
 C                 -4.51906000   -2.33773500    0.77393500
 C                 -2.79926600   -0.68900800    0.75823900
 C                 -3.82223100    0.28675500    0.74107300
 C                 -5.16825900   -0.02092400    0.73742800
 C                 -1.39198300   -0.33821700    0.76309200
 C                 -0.38873000   -1.38279000    0.76667300
 C                 -0.77168300   -2.74630200    0.77262100
 C                  0.96554900   -0.99464600    0.76491000
 H                  1.68555000   -1.80536400    0.76847500
 C                  1.39119500    0.33734900    0.76313400
 C                  0.38793800    1.38191900    0.76675400
 C                 -0.96634500    0.99377300    0.76491400
 H                 -6.54369700   -1.71775300    0.76651000
 H                 -4.73438900   -3.39788400    0.79297300
 H                 -3.53331600    1.32974800    0.72982000
 H                  0.03935500   -3.47418900    0.77418400
 H                 -1.68634600    1.80449200    0.76843900
 C                  2.79847000    0.68815200    0.75826700
 C                  3.82145100   -0.28760100    0.74081300
 C                  4.51825600    2.33689000    0.77429000
 C                  5.16747200    0.02009000    0.73723400
 H                  3.53254400   -1.33059100    0.72922900
 C                  5.50595800    1.39489300    0.75835300
 H                  4.73357100    3.39703700    0.79352800
 H                  6.54289200    1.71693400    0.76673000
 C                  0.77087700    2.74543000    0.77286400
 H                 -0.04016100    3.47331600    0.77445800
 C                 -2.70365500   -4.65808900    0.78593500
 C                 -2.88512000   -5.35798800    2.00168900
 C                 -2.94772000   -5.34969000   -0.42498800
 C                 -3.29077200   -6.69780000    1.99013300
 C                 -3.35297900   -6.68827200   -0.40320000
 C                 -3.52745800   -7.38409500    0.79672500
 H                 -3.42270700   -7.21913900    2.93720600
 H                 -3.53408700   -7.20220400   -1.34638000
 C                  2.70285900    4.65722100    0.78681500
 C                  2.94687100    5.34916000   -0.42392200
 C                  2.88445400    5.35676400    2.00276500
 C                  3.35220200    6.68771800   -0.40177200
 C                  3.29016800    6.69655800    1.99156600
 C                  3.52680500    7.38318400    0.79833600
 H                  3.53325400    7.20192100   -1.34481300
 H                  3.42217200    7.21762300    2.93878200
 C                 -2.78130800   -4.64947800   -1.75829900
 H                 -3.52819700   -3.85550600   -1.89565000
 H                 -1.79873100   -4.17128500   -1.83894900
 H                 -2.89183600   -5.35025100   -2.59258400
 C                 -2.65414300   -4.66886400    3.33122900
 H                 -1.67646900   -4.17556000    3.36204000
 H                 -3.40473600   -3.88886200    3.51926400
 H                 -2.70695700   -5.37997000    4.16244800
 C                 -3.93087300   -8.84073400    0.79909000
 H                 -3.06178900   -9.49699700    0.65422800
 H                 -4.39826400   -9.12617000    1.74771400
 H                 -4.63880700   -9.06353900   -0.00743700
 C                  2.65370800    4.66724700    3.33214100
 H                  1.67695200    4.17210200    3.36218800
 H                  3.40566500    3.88869300    3.52079800
 H                  2.70455800    5.37846400    4.16338900
 C                  3.93023500    8.83981900    0.80111600
 H                  3.06093300    9.49618800    0.65804500
 H                  4.39905400    9.12459900    1.74923600
 H                  4.63694800    9.06317700   -0.00632200
 C                  2.78035800    4.64935500   -1.75743500
 H                  3.52747900    3.85567800   -1.89524100
 H                  1.79792000    4.17087200   -1.83801500
 H                  2.89047000    5.35045500   -2.59150100
 N                 -3.17495400   -2.03137100    0.76937900
 N                  3.17414700    2.03051600    0.76967800
 B                 -2.17856600   -3.15991800    0.77724800
 B                  2.17776200    3.15905400    0.77772900
 C                  6.23239500   -1.04692100    0.67539200
 C                  6.84013600   -1.20977200   -0.73434100
 H                  5.81002900   -2.00638600    0.99897100
 H                  7.03638700   -0.80287900    1.38367900
 C                  7.92061500   -2.29618100   -0.79886400
 H                  6.03523300   -1.44444500   -1.44421800
 H                  7.26314400   -0.24907600   -1.05978200
 C                  8.53298200   -2.46007400   -2.19604200
 H                  8.71710700   -2.06149400   -0.07711400
 H                  7.49068300   -3.25555300   -0.47522700
 H                  7.73398900   -2.68512100   -2.91786700
 H                  8.96889200   -1.50187100   -2.51553400
 C                 -6.23313500    1.04614800    0.67578500
 C                 -6.83995800    1.21012700   -0.73421200
 H                 -5.81095300    2.00535300    1.00038200
 H                 -7.03757300    0.80156500    1.38337000
 C                 -7.91973500    2.29723600   -0.79878300
 H                 -6.03450200    1.44471800   -1.44348700
 H                 -7.26333900    0.24985600   -1.06042300
 C                 -8.53148000    2.46194300   -2.19614000
 H                 -8.71663800    2.06287000   -0.07738400
 H                 -7.48928900    3.25623300   -0.47471800
 H                 -7.73202200    2.68631500   -2.91766000
 H                 -8.96822300    1.50421800   -2.51592600
 C                  9.60501900   -3.55478400   -2.27021600
 C                 10.22054700   -3.71573200   -3.66620300
 H                  9.16795000   -4.51391500   -1.95461700
 H                 10.40318200   -3.33298400   -1.54594800
 C                 11.28646300   -4.81405600   -3.73412400
 H                  9.42276000   -3.93481400   -4.39011900
 H                 10.66028000   -2.75833700   -3.98016100
 H                 11.70682800   -4.90201300   -4.74242900
 H                 12.11457400   -4.60673800   -3.04503800
 H                 10.86746200   -5.79063100   -3.46177500
 C                 -9.60241400    3.55772000   -2.27050100
 C                -10.21730200    3.71949300   -3.66668000
 H                 -9.16450100    4.51636800   -1.95460600
 H                -10.40104500    3.33660500   -1.54654200
 C                -11.28197000    4.81901300   -3.73482800
 H                 -9.41901800    3.93775000   -4.39029600
 H                -10.65799800    2.76262200   -3.98088300
 H                -11.70205200    4.90742200   -4.74321100
 H                -12.11043500    4.61262700   -3.04588800
 H                -10.86192700    5.79512000   -3.46241300
178
Compound (BN)2-2
B                 -7.12183600   -2.30869600   -0.27573000
 N                 -7.89478900   -0.79726500   -0.23189900
 C                 -5.89003000   -1.93286400   -1.31690300
 H                 -5.26130400   -2.79136800   -1.56000000
 H                 -6.26665100   -1.55516600   -2.27112700
 C                 -5.05007600   -0.83448100   -0.73114200
 C                 -3.65722400   -0.87667400   -0.67072100
 H                 -3.14912600   -1.75075900   -1.06854900
 C                 -2.89592000    0.17768000   -0.14108600
 C                 -3.57479000    1.31585100    0.32950800
 H                 -3.01622300    2.13081200    0.77972800
 C                 -4.96079900    1.38025200    0.27611800
 H                 -5.46337300    2.24955700    0.69110500
 C                 -5.71105700    0.31435300   -0.24718800
 C                 -1.41821200    0.08809700   -0.07000900
 C                 -0.77901300   -1.13051500    0.21612900
 H                 -1.37922200   -2.01146700    0.42470100
 C                 -0.60750600    1.21597000   -0.28398100
 H                 -1.06908100    2.16498000   -0.54231600
 C                 -7.18261900    0.36917800   -0.29282100
 C                 -7.86028900    1.59330000   -0.38997600
 H                 -7.27377400    2.49917600   -0.49705400
 C                 -9.25134100    1.66921100   -0.38194000
 C                 -9.94705000    0.45707200   -0.28971000
 H                -11.03233800    0.43020000   -0.28875800
 C                 -9.24179100   -0.73120200   -0.23181400
 H                 -9.74839200   -1.68683900   -0.19969200
 C                 -6.38217600   -2.70840900    1.16163700
 C                 -6.43692900   -2.00393600    2.39965800
 C                 -5.65858600   -2.40177200    3.49598200
 H                 -5.73536000   -1.83249100    4.42155700
 C                 -4.80782800   -3.50344100    3.45671800
 C                 -4.78763900   -4.23021500    2.27030900
 H                 -4.17097200   -5.12702800    2.20957400
 C                 -5.54097100   -3.86083900    1.14746900
 C                 -5.39171500   -4.80174400   -0.04114700
 H                 -5.29865900   -5.83526700    0.31271900
 H                 -4.47948700   -4.58676900   -0.61501100
 H                 -6.23295900   -4.76745900   -0.73240900
 C                 -7.34602300   -0.81689900    2.68069100
 H                 -7.41997500   -0.65513900    3.76111700
 H                 -8.36498500   -0.95868700    2.31019000
 H                 -6.96841400    0.11662500    2.24912400
 C                 -3.95595100   -3.89109600    4.64234300
 H                 -4.43127000   -3.60852200    5.58858800
 H                 -2.97567600   -3.39520300    4.61370100
 H                 -3.77028900   -4.97091600    4.66731000
 C                 -8.27048500   -3.40262600   -0.80065900
 C                 -8.58364100   -3.61324300   -2.18096100
 C                 -9.46909400   -4.62290100   -2.58422800
 H                 -9.66484900   -4.74923600   -3.64811000
 C                -10.11834000   -5.45828300   -1.67981700
 C                 -9.89402300   -5.20604000   -0.33043100
 H                -10.42797900   -5.79926500    0.41049100
 C                 -9.01273300   -4.21087000    0.11849400
 C                 -8.96324400   -4.06135400    1.63065400
 H                 -9.83649800   -4.55070400    2.07654200
 H                 -8.97372400   -3.01833100    1.95437300
 H                 -8.06908500   -4.51381100    2.06847000
 C                 -8.04989200   -2.76841900   -3.32756200
 H                 -8.62958900   -2.96787500   -4.23489800
 H                 -7.00279200   -2.98560700   -3.56356600
 H                 -8.12549700   -1.69463800   -3.12885700
 C                -11.03018600   -6.57050000   -2.13987800
 H                -11.81540100   -6.77650400   -1.40391100
 H                -10.47425000   -7.50619000   -2.28974400
 H                -11.51340300   -6.32688900   -3.09285500
 C                 -9.97852000    2.98934700   -0.45108800
 H                 -9.34982800    3.73200800   -0.95830000
 H                -10.88158900    2.86618600   -1.06006400
 C                -10.36313800    3.52288100    0.94801600
 H                 -9.44609300    3.64294700    1.53937900
 H                -10.96533600    2.76544200    1.46862100
 C                -11.12895800    4.85591500    0.91872600
 H                -10.53388600    5.60739900    0.37909000
 H                -11.21549100    5.22326300    1.95070000
 C                -12.53350000    4.77650000    0.30437100
 H                -13.10776700    3.99178300    0.81963400
 H                -12.46860000    4.46568400   -0.74783200
 C                -13.30580200    6.10031700    0.38183400
 H                -13.38416300    6.41455800    1.43326000
 H                -12.73068000    6.88787800   -0.12760900
 C                -14.71056200    6.02414700   -0.22954100
 H                -15.28390200    5.23597900    0.27902200
 H                -14.63116000    5.71142900   -1.28054200
 C                -15.47866200    7.34725700   -0.14757500
 H                -16.47554500    7.25929100   -0.59416700
 H                -14.94662300    8.14815600   -0.67564500
 H                -15.60758600    7.66738000    0.89368400
 B                  7.12185400    2.30862700    0.27585800
 N                  7.89480400    0.79722300    0.23192200
 C                  5.89001700    1.93275600    1.31698100
 H                  5.26128000    2.79124800    1.56009000
 H                  6.26660500    1.55502500    2.27120400
 C                  5.05008400    0.83439200    0.73115600
 C                  3.65723200    0.87657600    0.67072400
 H                  3.14912600    1.75063900    1.06858900
 C                  2.89594000   -0.17776100    0.14103900
 C                  3.57482300   -1.31591100   -0.32958800
 H                  3.01626800   -2.13086300   -0.77983800
 C                  4.96083200   -1.38030000   -0.27619600
 H                  5.46341500   -2.24958500   -0.69121500
 C                  5.71108000   -0.31441500    0.24715600
 C                  1.41823200   -0.08818500    0.06995600
 C                  0.77903300    1.13042700   -0.21618300
 H                  1.37924100    2.01137900   -0.42475500
 C                  0.60752600   -1.21605900    0.28392300
 H                  1.06910100   -2.16507000    0.54225600
 C                  7.18264200   -0.36923000    0.29277700
 C                  7.86032100   -1.59335600    0.38982500
 H                  7.27381400   -2.49924200    0.49685100
 C                  9.25137200   -1.66926000    0.38173400
 C                  9.94707300   -0.45711100    0.28955400
 H                 11.03236100   -0.43023800    0.28855500
 C                  9.24180900    0.73116300    0.23176800
 H                  9.74840400    1.68680300    0.19968600
 C                  6.38220500    2.70842600   -1.16148700
 C                  6.43700400    2.00404900   -2.39956100
 C                  5.65867500    2.40195000   -3.49586900
 H                  5.73548300    1.83274500   -4.42148800
 C                  4.80788400    3.50359600   -3.45653600
 C                  4.78765600    4.23027900   -2.27007400
 H                  4.17097000    5.12707500   -2.20928100
 C                  5.54098200    3.86083500   -1.14724800
 C                  5.39170900    4.80166500    0.04142700
 H                  5.29875000    5.83522000   -0.31237100
 H                  4.47942300    4.58670800    0.61520700
 H                  6.23290000    4.76727500    0.73274700
 C                  7.34615600    0.81707200   -2.68065500
 H                  7.42011200    0.65536400   -3.76108800
 H                  8.36511300    0.95890600   -2.31015100
 H                  6.96860700   -0.11649300   -2.24912700
 C                  3.95602100    3.89131500   -4.64214800
 H                  4.43143900    3.60896800   -5.58841200
 H                  2.97582000    3.39526700   -4.61364800
 H                  3.77019700    4.97111000   -4.66695000
 C                  8.27045600    3.40256400    0.80089800
 C                  8.58359400    3.61305900    2.18122300
 C                  9.46892400    4.62277900    2.58460600
 H                  9.66466900    4.74901200    3.64850300
 C                 10.11806500    5.45834500    1.68029300
 C                  9.89379000    5.20621800    0.33087700
 H                 10.42768900    5.79957800   -0.40997900
 C                  9.01262400    4.21099100   -0.11816200
 C                  8.96321700    4.06159600   -1.63033700
 H                  9.83645500    4.55105600   -2.07613800
 H                  8.97379500    3.01860100   -1.95413700
 H                  8.06904400    4.51401800   -2.06816200
 C                  8.04998400    2.76802800    3.32773700
 H                  8.62978200    2.96734200    4.23504100
 H                  7.00290900    2.98516800    3.56389900
 H                  8.12558200    1.69428100    3.12884700
 C                 11.02977000    6.57063000    2.14047200
 H                 11.81522900    6.77651000    1.40472800
 H                 10.47379400    7.50635000    2.28999700
 H                 11.51267100    6.32716700    3.09364500
 C                  9.97856200   -2.98939600    0.45075800
 H                  9.34987600   -3.73211300    0.95789700
 H                 10.88162800   -2.86628500    1.05975000
 C                 10.36319200   -3.52279300   -0.94839500
 H                  9.44615300   -3.64280200   -1.53977700
 H                 10.96539500   -2.76530300   -1.46892000
 C                 11.12901500   -4.85582800   -0.91922700
 H                 10.53394700   -5.60736100   -0.37965400
 H                 11.21554400   -5.22308700   -1.95123300
 C                 12.53355900   -4.77646200   -0.30487000
 H                 13.10782800   -3.99171500   -0.82008400
 H                 12.46866400   -4.46571300    0.74735200
 C                 13.30585300   -6.10027800   -0.38242100
 H                 13.38420900   -6.41445200   -1.43386800
 H                 12.73073000   -6.88786900    0.12697300
 C                 14.71061600   -6.02415400    0.22895300
 H                 15.28395800   -5.23595600   -0.27956200
 H                 14.63122000   -5.71150300    1.27997400
 C                 15.47871000   -7.34726200    0.14689900
 H                 16.47559300   -7.25933100    0.59349600
 H                 14.94666800   -8.14819400    0.67491600
 H                 15.60763100   -7.66731700   -0.89438200
136
Compound (BN)2-2a
C                 -9.98386800    0.21881300    0.63859400
 C                 -9.31780000    0.98152200   -0.27132100
 C                 -7.18336500    0.20244400    0.47247600
 C                 -7.88311600   -0.59725500    1.41739000
 C                 -9.25397200   -0.61851300    1.52542000
 C                 -5.75350400    0.21366300    0.37600400
 C                 -5.09882200    1.00911800   -0.63063600
 C                 -3.67163300    0.97407500   -0.69428000
 H                 -3.19085900    1.59679900   -1.44433000
 C                 -2.90040800    0.22730200    0.17173400
 C                 -3.56703700   -0.54278900    1.17200500
 C                 -4.93571100   -0.54885900    1.26000900
 H                -11.06803000    0.26163800    0.67414000
 H                 -9.83172700    1.63109300   -0.96746800
 H                 -7.30478000   -1.22600100    2.08200500
 H                 -2.98203000   -1.15601800    1.85059400
 H                 -5.38830800   -1.16072000    2.03220700
 C                 -1.42006300    0.22128100    0.08252700
 C                 -0.62275900    0.21652900    1.23967600
 C                 -0.76481000    0.21977900   -1.16022200
 C                  0.76607100    0.22144900    1.15813900
 H                 -1.09835700    0.22825100    2.21655900
 C                  0.62403600    0.21478200   -1.24175200
 H                 -1.35437900    0.20295500   -2.07257300
 C                  1.42133200    0.22121600   -0.08461400
 H                  1.35564300    0.20593100    2.07050900
 H                  1.09963600    0.22512000   -2.21865200
 C                  2.90168500    0.22723900   -0.17365600
 C                  3.67261900    0.97537000    0.69145400
 C                  3.56864900   -0.54424200   -1.17261300
 C                  5.09980700    1.01039600    0.62820200
 H                  3.19158700    1.59915900    1.44045000
 C                  4.93736700   -0.55034300   -1.26019200
 H                  2.98389200   -1.15852000   -1.85047300
 C                  5.75485500    0.21352300   -0.37706300
 H                  5.39023600   -1.16337700   -2.03130000
 C                  7.18477000    0.20224100   -0.47303700
 C                  7.88488300   -0.59849200   -1.41678100
 C                  9.31892500    0.98219600    0.27072000
 C                  9.25578400   -0.61991100   -1.52420700
 H                  7.30681700   -1.22789000   -2.08102000
 C                  9.98535200    0.21835400   -0.63800200
 H                  9.83263800    1.63256800    0.96628600
 H                 11.06952800    0.26109600   -0.67313000
 N                 -7.94134100    0.99702300   -0.39201700
 N                  7.94242200    0.99789800    0.39076400
 C                 -5.85052100    1.80576300   -1.51596500
 H                 -5.28685800    2.38410000   -2.24704800
 B                 -7.32118500    1.86247900   -1.44656000
 C                 -8.25327000    2.74896200   -2.37469700
 C                 -8.62004700    4.05996600   -1.98993400
 C                 -8.68504800    2.27634800   -3.63627100
 C                 -9.39018900    4.85537900   -2.84587000
 C                 -9.45367800    3.09659500   -4.46919700
 C                 -9.82097100    4.39119200   -4.09132500
 H                 -9.65492400    5.86486000   -2.53448600
 H                 -9.76969400    2.71670700   -5.43985500
 C                 -8.18507000    4.62002700   -0.65105700
 H                 -8.65943200    4.08795300    0.18490100
 H                 -7.10249900    4.52517700   -0.50923800
 H                 -8.45022200    5.67828300   -0.55711900
 C                 -8.32288200    0.88091400   -4.10252200
 H                 -7.24046800    0.71360200   -4.06659100
 H                 -8.78015700    0.10999000   -3.46763100
 H                 -8.66204200    0.70440700   -5.12864300
 C                -10.67486400    5.25299400   -4.99274800
 H                -11.74545700    5.07199600   -4.82434400
 H                -10.49551900    6.31905400   -4.81580200
 H                -10.47623400    5.04759100   -6.05049900
 C                  5.85115600    1.80836000    1.51264100
 H                  5.28722600    2.38776500    2.24266300
 B                  7.32184000    1.86483900    1.44380300
 C                  8.25280800    2.75289000    2.37151100
 C                  8.62168800    4.06289200    1.98403000
 C                  8.68863000    2.28013900    3.63118900
 C                  9.39557300    4.85752100    2.83668900
 C                  9.46124200    3.10006000    4.46139000
 C                  9.82353900    4.39595500    4.08454400
 H                  9.66771900    5.86346700    2.52015100
 H                  9.78623500    2.71763500    5.42799300
 C                  8.19116100    4.61892600    0.64203100
 H                  8.66435500    4.08171800   -0.19127500
 H                  7.10837200    4.52752300    0.49944900
 H                  8.46016900    5.67585000    0.54418400
 C                  8.33436900    0.88199700    4.09544200
 H                  7.25299900    0.70855100    4.05734200
 H                  8.79735700    0.11415000    3.46092500
 H                  8.67249300    0.70663400    5.12210300
 C                 10.62601400    5.28199200    5.00930300
 H                 11.26986300    5.96942300    4.44932200
 H                  9.97083900    5.89644400    5.64182800
 H                 11.26180700    4.69272500    5.67916100
 C                 -9.96708900   -1.51495300    2.50795900
 C                -10.62239300   -2.74028700    1.83625400
 H                -10.74277200   -0.93932600    3.03243900
 H                 -9.25920200   -1.85693100    3.27326100
 C                -11.34502500   -3.65696100    2.83102400
 H                -11.33178400   -2.39776600    1.06996700
 H                 -9.84916300   -3.30947700    1.30240700
 C                -12.00506400   -4.87088000    2.16414700
 H                -10.62959200   -4.00321400    3.59159500
 H                -12.10824200   -3.07876000    3.37274700
 H                -12.72753200   -4.52233700    1.41122500
 H                -11.24271800   -5.43987800    1.61174600
 C                  9.96933600   -1.51742200   -2.50545400
 C                 10.62381200   -2.74237600   -1.83222900
 H                 10.74553500   -0.94246600   -3.02989100
 H                  9.26189200   -1.85990800   -3.27094200
 C                 11.34658700   -3.66021100   -2.82582900
 H                 11.33293100   -2.39941300   -1.06588900
 H                  9.85007600   -3.31077600   -1.29827800
 C                 12.00586900   -4.87382400   -2.15766000
 H                 10.63137100   -4.00684300   -3.58643200
 H                 12.11026300   -3.08275300   -3.36770200
 H                 12.72827000   -4.52496700   -1.40482200
 H                 11.24310400   -5.44202200   -1.60501500
 C                -12.71493400   -5.80400900    3.15333700
 C                -13.38071800   -7.01305800    2.48361600
 H                -13.47429600   -5.23529000    3.71072200
 H                -11.99114300   -6.15790700    3.90277900
 C                -14.08236700   -7.94424400    3.47730900
 H                -14.10711200   -6.65909900    1.73815000
 H                -12.62287000   -7.57911100    1.92353100
 H                -14.55066400   -8.79394900    2.96759200
 H                -13.37426600   -8.34626800    4.21247700
 H                -14.86737600   -7.41446700    4.03111800
 C                 12.71561800   -5.80809700   -3.14587000
 C                 13.38050900   -7.01700800   -2.47502000
 H                 13.47548100   -5.24018900   -3.70339800
 H                 11.99190900   -6.16216400   -3.89531200
 C                 14.08191600   -7.94934500   -3.46781500
 H                 14.10689000   -6.66291000   -1.72960800
 H                 12.62216900   -7.58220600   -1.91473900
 H                 14.54962000   -8.79891200   -2.95732600
 H                 13.37378300   -8.35154000   -4.20285800
 H                 14.86735100   -7.42040600   -4.02182200
178
Compound (BN)2-3
 B                  6.29317700    0.31062400    0.78850400
 N                  5.01364200   -0.80297000    0.81142800
 C                  7.11928900   -0.21978200    2.12285400
 H                  7.99134000    0.39507900    2.35261100
 H                  6.49607900   -0.20093700    3.02073000
 C                  7.54186800   -1.64822000    1.93091800
 C                  8.83275300   -2.11708800    2.19435400
 H                  9.58462900   -1.41322200    2.54185400
 C                  9.16779500   -3.45872700    2.01463800
 H                 10.18131200   -3.79485500    2.21826500
 C                  8.20744100   -4.36782500    1.56481500
 H                  8.46582400   -5.41118000    1.40849700
 C                  6.91554800   -3.92338100    1.30148200
 H                  6.18003600   -4.62474600    0.91760900
 C                  6.57417800   -2.57249400    1.48314000
 C                  5.20596400   -2.09633100    1.20704000
 C                  4.09937600   -2.94467400    1.33193200
 H                  4.26448300   -3.95352500    1.69377500
 C                  2.80278200   -2.53953800    1.02100800
 C                  2.63330100   -1.20435700    0.59429900
 C                  3.76324600   -0.39600500    0.52149600
 H                  3.67709400    0.64395000    0.23265200
 C                  1.30653500   -0.62480100    0.22720200
 C                  0.99152400   -0.36083700   -1.11358600
 H                  1.71839700   -0.58800900   -1.88863500
 C                  0.34748100   -0.32940900    1.20658600
 H                  0.57751500   -0.50614500    2.25378900
 C                  7.32436100    0.08384300   -0.49874400
 C                  8.54375800    0.82436600   -0.47963900
 C                  9.53055000    0.63412300   -1.45681900
 H                 10.43919500    1.23334800   -1.40083700
 C                  9.38770700   -0.28068900   -2.49524200
 C                  8.18186600   -0.97515000   -2.55040300
 H                  8.01411300   -1.66706400   -3.37495900
 C                  7.16529800   -0.80773500   -1.59952100
 C                  5.90457000   -1.60787400   -1.89046600
 H                  5.93195100   -1.97992600   -2.91990800
 H                  4.99011000   -1.01577300   -1.79044300
 H                  5.79764700   -2.48483400   -1.24301500
 C                 10.48008800   -0.50624100   -3.51378800
 H                 10.06794900   -0.77869800   -4.49217800
 H                 11.15234400   -1.32054100   -3.20944900
 H                 11.09762600    0.38943100   -3.64506100
 C                  8.88489500    1.89166300    0.55227800
 H                  9.41957900    2.71799500    0.06915600
 H                  9.55525700    1.50114900    1.33038000
 H                  8.01092600    2.31292000    1.04765200
 C                  5.59811200    1.82799400    0.87825100
 C                  5.16518800    2.41780400    2.10784500
 C                  4.72650500    3.74804600    2.16684300
 H                  4.42173100    4.15361500    3.13062100
 C                  4.65325700    4.56444000    1.04196800
 C                  4.97022300    3.97271800   -0.17648500
 H                  4.86341400    4.55813300   -1.08868400
 C                  5.41736200    2.64717600   -0.28164000
 C                  5.64199300    2.17848400   -1.71045900
 H                  5.12647400    2.85367300   -2.40294100
 H                  5.25884600    1.17160900   -1.88961900
 H                  6.69967100    2.16248700   -1.98767100
 C                  4.23623300    6.01235900    1.13810000
 H                  3.73599800    6.34863200    0.22249400
 H                  5.10428600    6.66840100    1.29008600
 H                  3.55461000    6.18072900    1.97967300
 C                  5.08516800    1.68424100    3.43815400
 H                  4.44405100    2.24175500    4.12923500
 H                  6.06134200    1.57961700    3.92412800
 H                  4.65790400    0.68148100    3.34173000
 C                  1.66382200   -3.52979800    1.08394800
 H                  0.74352800   -3.03256500    1.40648700
 H                  1.89385200   -4.29828800    1.83207100
 C                  1.41324300   -4.20734900   -0.28231600
 H                  1.22553000   -3.43140900   -1.03607200
 H                  2.32752800   -4.72900900   -0.59755500
 C                  0.23514000   -5.18858600   -0.25696900
 H                  0.41524300   -5.95862300    0.50775100
 H                 -0.67502000   -4.65564900    0.05336600
 C                 -0.00846300   -5.86430800   -1.61306000
 H                 -0.16038500   -5.09050100   -2.38006200
 H                  0.89481600   -6.41614400   -1.91296800
 C                 -1.21050800   -6.81703500   -1.61436500
 H                 -2.11225300   -6.25871800   -1.32207300
 H                 -1.06562300   -7.58852800   -0.84309300
 C                 -1.45350000   -7.49665200   -2.96818400
 H                 -1.59599300   -6.72603900   -3.73916300
 H                 -0.55264200   -8.05513900   -3.26005300
 C                 -2.66014500   -8.44063100   -2.96145800
 H                 -2.80871400   -8.90788000   -3.94158400
 H                 -3.58190100   -7.90374300   -2.70533900
 H                 -2.53130500   -9.24399400   -2.22561400
 B                 -6.18734000   -0.54302300   -0.13494500
 N                 -4.95488600    0.48771500   -0.67334000
 C                 -7.11776700   -0.54153100   -1.50512600
 H                 -7.97604100   -1.21270200   -1.43896400
 H                 -6.54670000   -0.86690400   -2.38003700
 C                 -7.58700400    0.85496600   -1.80098900
 C                 -8.90948100    1.17434500   -2.12461800
 H                 -9.64928200    0.37835600   -2.14887900
 C                 -9.29057100    2.48527300   -2.40844200
 H                -10.32731400    2.70724100   -2.64824500
 C                 -8.34542900    3.51330800   -2.37556600
 H                 -8.63832700    4.53886100   -2.58099900
 C                 -7.02291700    3.21664500   -2.06195300
 H                 -6.29782000    4.02359200   -2.00405000
 C                 -6.63466400    1.89644700   -1.77703400
 C                 -5.23174900    1.57003700   -1.46088000
 C                 -4.17349500    2.34495300   -1.94637000
 H                 -4.40801600    3.18567600   -2.58978200
 C                 -2.83789400    2.07991800   -1.64551300
 C                 -2.57448100    0.93835500   -0.85621300
 C                 -3.66847200    0.19752600   -0.40953500
 H                 -3.51619000   -0.69853900    0.17857200
 C                 -1.21522000    0.45183000   -0.48810100
 C                 -0.89192600    0.20124000    0.85479600
 H                 -1.61671100    0.42987500    1.63120200
 C                 -0.25138900    0.16074900   -1.46627700
 H                 -0.48652200    0.31058600   -2.51609900
 C                 -7.13197400    0.13342500    1.05954500
 C                 -8.30974600   -0.58653700    1.42200800
 C                 -9.22560600   -0.07049600    2.34903400
 H                -10.10313600   -0.66677800    2.59842300
 C                 -9.05228400    1.16541700    2.96431200
 C                 -7.88640900    1.85797300    2.64883400
 H                 -7.69324200    2.81012000    3.14159100
 C                 -6.93853800    1.37366400    1.73595700
 C                 -5.71414600    2.26484800    1.58846400
 H                 -5.65955500    2.96034900    2.43236700
 H                 -4.77240500    1.71001900    1.57329400
 H                 -5.74666700    2.87665800    0.68014500
 C                -10.07335900    1.72607500    3.92583600
 H                 -9.60535100    2.36788100    4.68094700
 H                -10.82411000    2.33615000    3.40453800
 H                -10.61328800    0.92847200    4.44857200
 C                 -8.68323000   -1.95890200    0.87647600
 H                 -9.15955900   -2.55446600    1.66398100
 H                 -9.41473400   -1.88193400    0.06010600
 H                 -7.83187700   -2.52873100    0.50643900
 C                 -5.46064400   -1.98116400    0.31266100
 C                 -5.19861000   -3.05366900   -0.59721700
 C                 -4.73887900   -4.29951800   -0.14649500
 H                 -4.57887900   -5.09051300   -0.87818700
 C                 -4.47748300   -4.56341300    1.19576800
 C                 -4.62941200   -3.49876400    2.07786700
 H                 -4.37840200   -3.64592900    3.12735500
 C                 -5.09380700   -2.23900100    1.67171900
 C                 -5.13299000   -1.20303900    2.78287100
 H                 -4.49129000   -1.52687100    3.61029700
 H                 -4.77870700   -0.22218300    2.45934500
 H                 -6.14023500   -1.05438600    3.18210200
 C                 -4.04711100   -5.93129900    1.66945400
 H                 -3.45759900   -5.86938000    2.59101900
 H                 -4.91561700   -6.56900200    1.88371500
 H                 -3.44508300   -6.45099200    0.91551500
 C                 -5.34687800   -2.95649300   -2.10734100
 H                 -4.85828900   -3.81297800   -2.58371700
 H                 -6.39207000   -2.96203200   -2.43376700
 H                 -4.88116700   -2.05363100   -2.51521100
 C                 -1.77920000    3.06006800   -2.09703500
 H                 -0.82339100    2.56078800   -2.27260100
 H                 -2.08914300    3.50500500   -3.05089600
 C                 -1.56999100    4.18678400   -1.05951800
 H                 -1.22444000    3.74445800   -0.11557700
 H                 -2.53795100    4.65906000   -0.84250700
 C                 -0.57173800    5.25154100   -1.53078400
 H                 -0.92294700    5.68170800   -2.48052600
 H                  0.39559300    4.77649200   -1.74888500
 C                 -0.36750000    6.37708000   -0.50833600
 H                  0.01009100    5.94863900    0.43142200
 H                 -1.34136500    6.82880000   -0.26766100
 C                  0.59242500    7.47310500   -0.98874200
 H                  1.56562800    7.02290900   -1.23548400
 H                  0.21162100    7.90481400   -1.92653900
 C                  0.80039100    8.59547900    0.03604900
 H                  1.19232400    8.16504900    0.96836400
 H                 -0.17348200    9.03747000    0.29069100
 C                  1.74719000    9.69471700   -0.45645700
 H                  1.87566800   10.47975600    0.29737200
 H                  2.74005100    9.28906800   -0.68666500
 H                  1.36417000   10.16845200   -1.36881900
136
Compound (BN)2-3a
C                 -9.95414200   -0.78719300   -0.09509000
 C                 -9.15457600   -1.66403100    0.59054200
 C                 -7.14291100   -0.42862700   -0.10933500
 C                 -8.01004400    0.45845500   -0.81332400
 C                 -9.37369800    0.29110700   -0.81067200
 C                 -5.72019800   -0.24903000   -0.11174700
 C                 -3.53976800   -0.96579500    0.52902700
 H                 -2.97620800   -1.71994900    1.06272400
 C                 -2.90709200    0.05546700   -0.12858500
 C                 -3.71980100    1.02268500   -0.81393900
 C                 -5.08105100    0.83108000   -0.77803400
 H                -11.03368900   -0.91582000   -0.09529500
 H                 -9.59148500   -2.49503600    1.13879500
 H                 -7.60044800    1.28871700   -1.37764200
 H                -10.00621100    0.98345600   -1.35883700
 H                 -5.71499400    1.55323100   -1.27000000
 C                 -1.41879500    0.10718100   -0.07257900
 C                 -0.63520800    0.10243400   -1.23674900
 C                 -0.75554800    0.10519900    1.16516400
 C                  0.75551700    0.10525000   -1.16522300
 H                 -1.11649300    0.07133800   -2.20972300
 C                  0.63517100    0.10242400    1.23669000
 H                 -1.33957800    0.10277900    2.08132000
 C                  1.41875800    0.10722700    0.07251600
 H                  1.33953900    0.10287400   -2.08138300
 H                  1.11646600    0.07131100    2.20965900
 C                  2.90705300    0.05553800    0.12856500
 C                  3.53977700   -0.96569300   -0.52904300
 C                  3.71970500    1.02272300    0.81403300
 H                  2.97626100   -1.71984800   -1.06278600
 C                  5.08095800    0.83112000    0.77822200
 C                  5.72016200   -0.24893300    0.11189400
 H                  5.71485600    1.55319800    1.27035100
 C                  7.14288100   -0.42850200    0.10954500
 C                  8.00999000    0.45869700    0.81341700
 C                  9.15457500   -1.66405600   -0.58999900
 C                  9.37364000    0.29131400    0.81089600
 H                  7.60039000    1.28913100    1.37747900
 C                  9.95411100   -0.78714000    0.09556800
 H                  9.59150400   -2.49515500   -1.13809400
 H                 10.00613100    0.98376900    1.35895200
 H                 11.03365300   -0.91580800    0.09589400
 C                 -7.72931400   -1.52928200    0.61417200
 C                  7.72932100   -1.52925400   -0.61378700
 C                 -6.91918600   -2.43944300    1.31897300
 C                  6.91923800   -2.43944800   -1.31859800
 H                 -7.43499700   -3.24300500    1.84340500
 H                  7.43507800   -3.24308000   -1.84289200
 N                 -4.90534800   -1.15217000    0.56884600
 N                  4.90536500   -1.15205900   -0.56877500
 B                 -5.45101100   -2.31551400    1.33977100
 B                  5.45107400   -2.31542500   -1.33963000
 C                 -4.45569700   -3.29015300    2.09723700
 C                 -4.12582400   -3.07513500    3.45590100
 C                 -3.92294500   -4.43065200    1.45168700
 C                 -3.29524900   -3.97753200    4.12951200
 C                 -3.09496100   -5.31389100    2.15302300
 C                 -2.77089900   -5.10778200    3.49666500
 H                 -3.05353600   -3.79506700    5.17572500
 H                 -2.69495000   -6.18596900    1.63777900
 C                  4.45582700   -3.28998400   -2.09728700
 C                  4.12606700   -3.07477700   -3.45594900
 C                  3.92303800   -4.43058100   -1.45194300
 C                  3.29557300   -3.97709800   -4.12976100
 C                  3.09514200   -5.31374300   -2.15348000
 C                  2.77119700   -5.10745300   -3.49712100
 H                  3.05394500   -3.79448900   -5.17596900
 H                  2.69511000   -6.18590500   -1.63839400
 C                 -4.23354400   -4.70766100   -0.00523800
 H                 -5.31338800   -4.70448100   -0.19277000
 H                 -3.79684200   -3.94613200   -0.66562600
 H                 -3.83569400   -5.67838200   -0.31870500
 C                 -4.65940800   -1.86634300    4.19779900
 H                 -4.26506300   -0.92807100    3.78395900
 H                 -5.75126400   -1.80278100    4.12893000
 H                 -4.38569800   -1.89766400    5.25765500
 C                 -1.90484200   -6.09176100    4.24889200
 H                 -2.50781600   -6.89200600    4.69938300
 H                 -1.17467600   -6.57143100    3.58772700
 H                 -1.35605900   -5.60404800    5.06205000
 C                  4.23347700   -4.70777100    0.00498200
 H                  5.31329100   -4.70444300    0.19267600
 H                  3.79654700   -3.94641500    0.66542200
 H                  3.83573500   -5.67860400    0.31823900
 C                  4.65968600   -1.86586800   -4.19762800
 H                  4.26526600   -0.92766300   -3.78370700
 H                  5.75153300   -1.80228100   -4.12863500
 H                  4.38609100   -1.89705600   -5.25751800
 C                  1.90523100   -6.09135000   -4.24956200
 H                  2.50825500   -6.89156600   -4.70003600
 H                  1.17496100   -6.57106600   -3.58854400
 H                  1.35657200   -5.60355500   -5.06275500
 C                  3.09157000    2.21852800    1.50551800
 C                  4.03843600    3.35935200    1.90003500
 H                  2.56359400    1.87791100    2.40768400
 H                  2.30167200    2.61498100    0.85309700
 C                  3.29389000    4.54817100    2.52268500
 H                  4.78561500    2.99561900    2.61897500
 H                  4.59687500    3.69915100    1.01675800
 C                  4.22276300    5.69719300    2.93525000
 H                  2.54533500    4.92319600    1.80940400
 H                  2.72953600    4.20342700    3.40176600
 H                  4.97711100    5.31828300    3.64079200
 H                  4.78063600    6.04737200    2.05418900
 C                 -3.09171600    2.21851300   -1.50542100
 C                 -4.03859700    3.35935400   -1.89984800
 H                 -2.56380700    1.87791800   -2.40763300
 H                 -2.30176800    2.61494100   -0.85304500
 C                 -3.29408600    4.54809300   -2.52269400
 H                 -4.78591100    2.99562000   -2.61864500
 H                 -4.59687300    3.69923300   -1.01649800
 C                 -4.22295100    5.69716100   -2.93514400
 H                 -2.54536800    4.92309800   -1.80957200
 H                 -2.72992200    4.20326600   -3.40186400
 H                 -4.97749900    5.31826500   -3.64048000
 H                 -4.78058400    6.04746900   -2.05398300
 C                 -3.48534000    6.88166600   -3.57244800
 C                 -4.41353200    8.03172600   -3.98399800
 H                 -2.92949600    6.53128700   -4.45499500
 H                 -2.72878400    7.26086400   -2.86921500
 C                 -3.67027900    9.20797700   -4.62535700
 H                 -5.17130600    7.65190300   -4.68400900
 H                 -4.96569200    8.38458300   -3.10138400
 H                 -4.36012200   10.01114500   -4.90829300
 H                 -2.92968000    9.63245200   -3.93624400
 H                 -3.13624100    8.89328900   -5.53047200
 C                  3.48512400    6.88181900    3.57229200
 C                  4.41332400    8.03185900    3.98387800
 H                  2.92910500    6.53157600    4.45478400
 H                  2.72871300    7.26099300    2.86888900
 C                  3.67006100    9.20817800    4.62509800
 H                  5.17100700    7.65204400    4.68399200
 H                  4.96559300    8.38463800    3.10130200
 H                  4.35990700   10.01135000    4.90801600
 H                  2.92951600    9.63262300    3.93590700
 H                  3.13595700    8.89357500    5.53020300
116
Compound (BN)2-4
S                 -0.19905300    1.93588100    0.72964400
 N                 -1.70171500   -0.15931100   -0.51178500
 B                 -3.23537600    0.55485900   -0.66094000
 C                 -3.69245000   -0.10582700   -2.11072700
 H                 -4.70393500    0.19250400   -2.38840300
 H                 -3.05768400    0.22754600   -2.93627300
 C                 -3.61645800   -1.61057400   -2.10160400
 C                 -4.59793900   -2.43124600   -2.66616800
 H                 -5.48188300   -1.96811200   -3.09651100
 C                 -4.46283100   -3.81942000   -2.68993900
 H                 -5.24695800   -4.42874100   -3.13168800
 C                 -3.32846600   -4.43100000   -2.14712300
 H                 -3.22507300   -5.51173700   -2.15888300
 C                 -2.33846600   -3.64310100   -1.57421800
 H                 -1.46960500   -4.11407100   -1.12105700
 C                 -2.47758000   -2.24347600   -1.54685700
 C                 -1.45880300   -1.39764200   -0.95191100
 C                 -0.56076300    0.39792600    0.00536100
 C                 -4.30857800   -0.05411300    0.45032900
 C                 -4.02534600   -0.91542700    1.54792500
 C                 -5.05746500   -1.50250300    2.29441200
 H                 -4.79167500   -2.15818500    3.12254200
 C                 -6.40435700   -1.26467400    2.03332600
 C                 -6.68958900   -0.35989200    1.01434300
 H                 -7.72827500   -0.09515900    0.81669000
 C                 -5.68871400    0.23973300    0.23959200
 C                 -2.62726500   -1.23032100    2.05656000
 H                 -1.97918000   -0.34943900    2.08506000
 H                 -2.11689400   -2.00087000    1.46656100
 H                 -2.68338700   -1.61242300    3.08095300
 C                 -7.49827900   -1.94193800    2.82425600
 H                 -7.16942500   -2.18225300    3.84155600
 H                 -7.80848600   -2.88521200    2.35371800
 H                 -8.39070800   -1.31022500    2.89791000
 C                 -6.20223800    1.25475200   -0.77486600
 H                 -7.00689300    1.84911200   -0.32575700
 H                 -6.63528300    0.76790300   -1.65928400
 H                 -5.43682000    1.95054800   -1.11825700
 C                 -2.94878200    2.19274000   -0.64885500
 C                 -3.32416100    3.03668600    0.44663100
 C                 -3.17998100    4.43009000    0.36987200
 H                 -3.48936200    5.03041900    1.22380000
 C                 -2.64599500    5.07317500   -0.74307000
 C                 -2.19274700    4.25814500   -1.77658000
 H                 -1.71102500    4.71944500   -2.63757200
 C                 -2.32006700    2.86292000   -1.74796200
 C                 -3.85592600    2.54100800    1.78204600
 H                 -3.75914200    3.33547900    2.53007400
 H                 -3.31663200    1.66883900    2.15505300
 H                 -4.91129600    2.25691300    1.73872400
 C                 -2.54949400    6.57789400   -0.81946100
 H                 -2.43997800    7.02531500    0.17462200
 H                 -3.45277000    7.01055600   -1.27062800
 H                 -1.69900100    6.89663300   -1.43230800
 C                 -1.68952300    2.16767700   -2.94670200
 H                 -0.92308100    2.81513900   -3.38553100
 H                 -2.41810900    1.96103900   -3.74001800
 H                 -1.20446800    1.22247600   -2.69354600
 S                  0.19903600   -1.93591500   -0.72956700
 N                  1.70171200    0.15929300    0.51182400
 B                  3.23539000   -0.55485500    0.66094100
 C                  3.69250400    0.10587900    2.11069300
 H                  4.70399700   -0.19243600    2.38835800
 H                  3.05775600   -0.22747000    2.93626300
 C                  3.61650200    1.61062500    2.10152200
 C                  4.59799900    2.43132300    2.66601900
 H                  5.48196600    1.96821200    3.09633900
 C                  4.46287800    3.81949700    2.68975400
 H                  5.24701900    4.42883900    3.13145200
 C                  3.32848300    4.43105000    2.14697100
 H                  3.22508000    5.51178500    2.15870600
 C                  2.33846700    3.64312300    1.57413300
 H                  1.46958000    4.11407100    1.12099800
 C                  2.47759500    2.24349900    1.54680400
 C                  1.45880500    1.39763700    0.95192000
 C                  0.56075300   -0.39795500   -0.00529800
 C                  4.30854100    0.05410500   -0.45038000
 C                  4.02525600    0.91538900   -1.54798400
 C                  5.05733700    1.50244800   -2.29453500
 H                  4.79150600    2.15810000   -3.12267600
 C                  6.40424200    1.26464400   -2.03349600
 C                  6.68952600    0.35990700   -1.01448700
 H                  7.72822400    0.09519900   -0.81686200
 C                  5.68869100   -0.23970600   -0.23967700
 C                  2.62714800    1.23026200   -2.05655700
 H                  1.97906300    0.34937700   -2.08500000
 H                  2.11680500    2.00082400   -1.46655000
 H                  2.68321500    1.61233900   -3.08096300
 C                  7.49812500    1.94189000   -2.82449500
 H                  7.16919400    2.18225300   -3.84175900
 H                  7.80841200    2.88513400   -2.35395000
 H                  8.39052200    1.31014300   -2.89824700
 C                  6.20227200   -1.25467900    0.77479900
 H                  7.00691400   -1.84904600    0.32567500
 H                  6.63535100   -0.76778600    1.65917600
 H                  5.43688100   -1.95047300    1.11825100
 C                  2.94882200   -2.19274600    0.64892500
 C                  3.32419600   -3.03675400   -0.44652300
 C                  3.18004100   -4.43015400   -0.36967600
 H                  3.48941200   -5.03052800   -1.22357500
 C                  2.64608900   -5.07318400    0.74331600
 C                  2.19283800   -4.25810100    1.77678000
 H                  1.71113400   -4.71935600    2.63780600
 C                  2.32012600   -2.86287200    1.74807100
 C                  3.85591000   -2.54116100   -1.78198900
 H                  3.75912700   -3.33569200   -2.52995200
 H                  3.31657300   -1.66903800   -2.15505000
 H                  4.91127100   -2.25703000   -1.73872100
 C                  2.54962300   -6.57790000    0.81979300
 H                  2.43980100   -7.02536200   -0.17423900
 H                  3.45304600   -7.01053800    1.27069000
 H                  1.69932400   -6.89662200    1.43291800
 C                  1.68955500   -2.16756400    2.94675900
 H                  0.92313700   -2.81502200    3.38563500
 H                  2.41813100   -1.96083700    3.74006000
 H                  1.20446200   -1.22240300    2.69352600
74
Compound (BN)2-4a
C                 -0.92175400   -6.41281300    0.00022200
 C                 -1.97260100   -5.53532700    0.00022700
 C                 -1.77279100   -4.11452000    0.00014700
 C                 -0.40240200   -3.64734800    0.00006700
 C                  0.67056100   -4.59126700    0.00006400
 C                  0.42174900   -5.93757000    0.00013800
 H                 -3.84280800   -3.63088200    0.00018500
 H                 -1.10755500   -7.48377400    0.00028200
 H                 -2.99605900   -5.90177500    0.00028900
 C                 -2.84079200   -3.20403600    0.00014000
 C                 -0.16893600   -2.26590000    0.00000600
 H                  1.69755100   -4.23350300    0.00000000
 H                  1.24544400   -6.64525300    0.00013200
 C                 -0.67573000   -0.04883100    0.00002100
 S                  1.44453300   -1.52089900   -0.00006100
 C                  0.67567500    0.04882800    0.00002300
 S                 -1.44455000    1.52089200    0.00002800
 C                  0.16893500    2.26588800    0.00011200
 C                  0.40237500    3.64733800    0.00018500
 C                  2.84075700    3.20401200    0.00026900
 H                  3.84278700    3.63082500    0.00033200
 C                  1.77276500    4.11449600    0.00026700
 C                  1.97259900    5.53530500    0.00033300
 C                 -0.67058100    4.59126300    0.00011700
 C                  0.92174600    6.41278900    0.00029800
 H                  2.99605700    5.90175200    0.00039800
 C                 -0.42176000    5.93755800    0.00015300
 H                 -1.69757500    4.23350500    0.00000100
 H                  1.10754500    7.48375200    0.00034800
 H                 -1.24543800    6.64526100    0.00012100
 C                 -3.74044900   -0.61306400   -0.00009600
 C                 -4.27503800   -0.12444700   -1.21654300
 C                 -4.27513200   -0.12406400    1.21631700
 C                 -5.30132900    0.82562200   -1.19849200
 C                 -5.30129400    0.82594900    1.19801300
 C                 -5.83038000    1.31385500   -0.00037900
 H                 -5.70026500    1.19152000   -2.14323800
 H                 -5.70020900    1.19213300    2.14267800
 C                  3.74045400    0.61307300   -0.00004700
 C                  4.27509700    0.12463600   -1.21650200
 C                  4.27509800    0.12390600    1.21635400
 C                  5.30146500   -0.82540000   -1.19851400
 C                  5.30127000   -0.82604800    1.19798900
 C                  5.83045200   -1.31377800   -0.00047200
 H                  5.70050100   -1.19112700   -2.14327800
 H                  5.70015900   -1.19231700    2.14263800
 C                 -3.73820100   -0.60876400   -2.54765500
 H                 -2.72179000   -0.23558900   -2.73279800
 H                 -3.68659500   -1.70263400   -2.58664600
 H                 -4.36610700   -0.26689800   -3.37681200
 C                 -3.73831600   -0.60821400    2.54749500
 H                 -3.68766000   -1.70211600    2.58696800
 H                 -2.72151600   -0.23587400    2.73216100
 H                 -4.36568200   -0.26542400    3.37667900
 C                 -6.96473600    2.31214700   -0.00025600
 H                 -7.93971400    1.80629900    0.01534400
 H                 -6.92593500    2.96476800    0.87880600
 H                 -6.94342400    2.94491900   -0.89419300
 C                  3.73833500    0.60908000   -2.54760200
 H                  3.68647500    1.70294000   -2.58641200
 H                  4.36643200    0.26749700   -3.37673300
 H                  2.72204000    0.23567900   -2.73294400
 C                  3.73812100    0.60779000    2.54756700
 H                  3.68647900    1.70164400    2.58689600
 H                  2.72169700    0.23451700    2.73247100
 H                  4.36594300    0.26566900    3.37668300
 C                  6.96483300   -2.31204200   -0.00026900
 H                  7.93967800   -1.80631200    0.02455700
 H                  6.92092100   -2.97047100    0.87424400
 H                  6.94876000   -2.93888800   -0.89845000
 B                 -2.62596500   -1.73479400    0.00004800
 N                 -1.19215200   -1.34065500    0.00001000
 N                  1.19213900    1.34062000    0.00007900
 B                  2.62593000    1.73477300    0.00015300
